# Supplementary material
Source: PubMed Central journal article supplement (PMC3707960)
Supplement: NIHMS456966-supplement-213_2013_3045_MOESM1_ESM.pdf [file NIHMS456966-supplement-213_2013_3045_MOESM1_ESM.pdf]

| Strain          | Males      |            |                                     | Females    |            |                                     |
|-----------------|------------|------------|-------------------------------------|------------|------------|-------------------------------------|
|                 | Con/con    | Lit/con    | Comparison                          | Con/con    | Lit/con    | Comparison                          |
| <b>C57BL/6J</b> | 23.53±0.30 | 21.09±0.50 | <i>t</i> (22)=4.38, <i>p</i> <0.001 | 17.81±0.26 | 15.54±0.15 | <i>t</i> (22)=7.35, <i>p</i> <0.001 |
| <b>BALB/cJ</b>  | 26.26±0.29 | 23.42±0.62 | <i>t</i> (22)=4.12, <i>p</i> <0.001 | 20.79±0.31 | 18.71±0.42 | <i>t</i> (22)=3.94, <i>p</i> <0.001 |

**Table 1.** Body weights of subjects at the time of FST during the treatment phase of Experiment 1. Data are in grams and are expressed as mean±SEM. n=8-16 per group.

| Strain          | Males      |            |                 | Females    |            |                          |
|-----------------|------------|------------|-----------------|------------|------------|--------------------------|
|                 | Con/con    | Lit/con    | Comparison      | Con/con    | Lit/con    | Comparison               |
| <b>C57BL/6J</b> | 24.96±0.36 | 25.15±0.63 | $t(22) < 1, NS$ | 18.33±0.29 | 17.29±0.19 | $t(22) = 3.04, p < 0.01$ |
| <b>BALB/cJ</b>  | 27.21±0.31 | 27.30±0.42 | $t(22) < 1, NS$ | 21.28±0.33 | 20.33±0.44 | $t(22) = 1.71, NS$       |

**Table 2.** Body weights of subjects at the end of the withdrawal phase of Experiment 1. Data are in grams and are expressed as mean±SEM. n=8-16 per group.

| <b>Strain</b>   | <b>Control</b> | <b>Lithium</b> | <b>Comparison</b>     |
|-----------------|----------------|----------------|-----------------------|
| <b>C57BL/6J</b> | 25.45±0.41     | 21.66±0.45     | $t(22)=6.15, p<0.001$ |
| <b>CB6F1</b>    | 29.94±0.39     | 24.54±0.50     | $t(22)=8.43, p<0.001$ |

**Table 3.** Body weights of subjects at the end of the Experiment 3. Data are in grams and are expressed as mean±SEM. n=12 per group.
